# Supplementary material for: Results from the Canadian Nosocomial Infection Surveillance Program on Carbapenemase-Producing Enterobacteriaceae, 2010 to 2014
Source: PubMed Central journal article supplement (PMC5075087; doi:10.1128/aac.01359-16), 2016-10-21

Supplementary Table 1. Antimicrobial susceptibilities from 2010-2014 for all carbapenemase producers

| Antimicrobial Agent           | CLSI breakpoint criteria %(no.) |      |      |             |      |      |             |      |      |             |      |      |             |      |      |                 |      |      | MIC range (µg/mL) |
|-------------------------------|---------------------------------|------|------|-------------|------|------|-------------|------|------|-------------|------|------|-------------|------|------|-----------------|------|------|-------------------|
|                               | 2010 (n=26)                     |      |      | 2011 (n=64) |      |      | 2012 (n=53) |      |      | 2013 (n=56) |      |      | 2014 (n=62) |      |      | Overall (n=261) |      |      |                   |
|                               | %S                              | %I   | %R   | %S          | %I   | %R   | %S          | %I   | %R   | %S          | %I   | %R   | %S          | %I   | %R   | %S              | %I   | %R   |                   |
| Ampicillin                    | 0                               | 0    | 100  | 0           | 0    | 100  | 0           | 0    | 100  | 0           | 0    | 100  | 0           | 0    | 100  | 0               | 0    | 100  | ≥64               |
| Piperacillin-Tazobactam       | 11.5                            | 3.9  | 84.6 | 3.8         | 0    | 98.4 | 1.9         | 1.9  | 96.2 | 10.7        | 0    | 89.3 | 9.7         | 1.6  | 88.7 | 6.1             | 5.4  | 92.3 | ≤4-≥128           |
| Cefazolin                     | 3.9                             | 0    | 96.2 | 0           | 0    | 100  | 0           | 0    | 100  | 0           | 0    | 100  | 0           | 0    | 100  | 0.4             | 0    | 99.6 | ≤1-≥64            |
| Ceftriaxone                   | 7.7                             | 0    | 92.3 | 3.8         | 0    | 98.4 | 9.4         | 0    | 90.6 | 12.5        | 0    | 87.5 | 8.1         | 0    | 91.9 | 7.7             | 0    | 92.3 | ≤1-≥4             |
| Ciprofloxacin                 | 11.5                            | 7.7  | 80.8 | 32.8        | 3.8  | 65.6 | 41.5        | 3.8  | 54.7 | 44.6        | 1.8  | 53.6 | 37.1        | 8.1  | 54.8 | 34.9            | 4.2  | 59.8 | ≤0.5-≥4           |
| Ertapenem                     | 0                               | 0    | 100  | 0           | 3.8  | 98.4 | 3.8         | 0    | 96.2 | 3.6         | 0    | 96.4 | 1.6         | 1.6  | 96.8 | 1.9             | 0.8  | 97.3 | ≤0.5-≥8           |
| Meropenem                     | 7.7                             | 11.5 | 80.8 | 14.1        | 9.4  | 76.6 | 9.4         | 1.9  | 88.7 | 3.6         | 3.6  | 92.9 | 3.2         | 1.6  | 95.2 | 7.7             | 5    | 87.4 | ≤1-≥4             |
| Amikacin                      | 42.3                            | 0    | 15   | 64.1        | 3.1  | 32.8 | 71.7        | 1.9  | 26.4 | 67.9        | 1.8  | 30.4 | 74.2        | 3.2  | 22.3 | 66.7            | 2.3  | 31   | ≤16-≥64           |
| Tobramycin                    | 11.5                            | 19.2 | 69.2 | 21.9        | 12.5 | 65.6 | 37.7        | 11.3 | 50.9 | 33.9        | 14.3 | 51.8 | 27.4        | 9.7  | 62.9 | 28              | 12.6 | 59.4 | ≤4-≥16            |
| Gentamicin                    | 61.5                            | 11.5 | 26.9 | 46.9        | 14.1 | 39.1 | 50.9        | 5.7  | 43.4 | 51.8        | 3.6  | 44.6 | 41.9        | 6.5  | 51.6 | 49              | 8    | 42.9 | ≤4-≥16            |
| Nitrofurantoin                | 3.9                             | 7.7  | 88.5 | 15.6        | 18.8 | 65.6 | 24.5        | 17   | 58.5 | 25          | 12.5 | 62.5 | 27.4        | 21   | 51.6 | 21.1            | 16.5 | 62.5 | ≤32-≥128          |
| Trimethoprim-Sulfamethoxazole | 15.4                            | n/a  | 84.6 | 21.9        | n/a  | 78.1 | 45.3        | n/a  | 54.7 | 28.6        | n/a  | 71.4 | 32.3        | n/a  | 67.7 | 29.9            | n/a  | 70.1 | ≤2/38-≥4/76       |
| Tigecycline                   | 69.2                            | 11.5 | 19.2 | 65.6        | 15.6 | 18.8 | 58.5        | 20.8 | 20.8 | 64.3        | 17.9 | 17.9 | 71          | 12.9 | 16.1 | 65.1            | 16.1 | 18.4 | ≤2-≥8             |
| Colistin Etest <sup>b</sup>   | 69.2                            | n/a  | 7.7  | 79.7        | n/a  | 6.3  | 92.5        | n/a  | 1.9  | 76.8        | n/a  | 5.4  | 87.1        | n/a  | 4.8  | 83.1            | n/a  | 5    | 0.047-≥256        |



Supplementary Figure 2. Plasmid Restriction Fragment Length Polymorphisms (pRFLP) using BglII of 41 plasmids harbouring *bla*<sub>NDM</sub>-type from Enterobacteriaceae. Organism refers to the organism from which the plasmid was isolated. Region-West (British Columbia, Alberta, Saskatchewan, Manitoba), Central (Ontario, Quebec).RT-replicon type. Resistance type of plasmid: AMP-ampicillin, AMK-amikacin, AMC-amoxicillin/clavulanic acid, TZP-piperacillin/tazobactam, CFZ-cefazolin, FOX-cefoxitin, CPD-cefpodoxime ,CTX-cefotaxime, CAZ-ceftazidime, CRO-ceftriaxone, ERT-ertapenem, MEM-meropenem, GEN-gentamicin, TOB-tobramycin, SXT-trimethoprim/sulfamethoxazole.

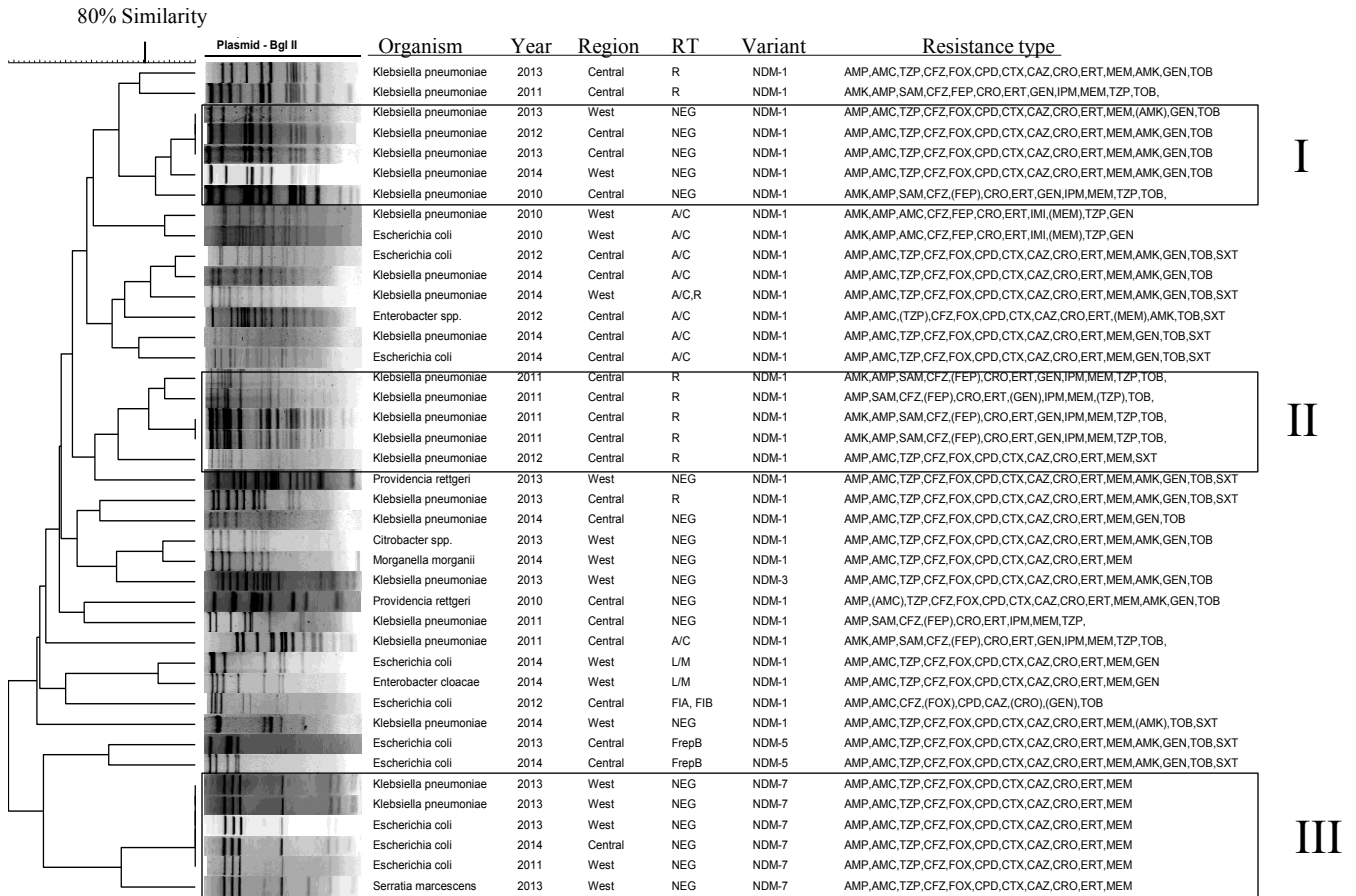

Supplement: AAC.01359-16_zac011165703so1.pdf [file AAC.01359-16_zac011165703so1.pdf]
